# Supplementary material for: Social presence effect in language comprehension: evidence from event-related potential (ERP) research
Source: PeerJ journal article supplement (doi:10.7717/peerj.18798), 2025-01-13
Supplement: ResultsForYuteng.zip [file 300-500-LAN-frontalThreeZones.xlsx]

## Sheet: 300-500-LAN-frontalThreeZones
PresenceOfOthersAndSemanticallyCorrectFrontal	PresenceOfOthersAndSemanticallyCorrectCentral	PresenceOfOthersAndSemanticallyCorrectParietal	PresenceOfOthersAndSemanticallyIncorrectFrontal	PresenceOfOthersAndSemanticallyIncorrectCentral	PresenceOfOthersAndSemanticallyIncorrectParietal	AloneAndSemanticallyCorrectFrontal	AloneAndSemanticallyCorrectCentral	AloneAndSemanticallyCorrectParietal	AloneAndSemanticallyIncorrectFrontal	AloneAndSemanticallyIncorrectCentral	NAloneAndSemanticallyIncorrectParietal
1.5507	-0.63987	-0.972967	-1.10451	-2.54583	-3.23094	0.530231	0.646197	1.12949	-2.3928	-3.15126	-2.75393
1.13265	1.2649	2.09465	1.3194	0.983437	2.49282	1.70293	2.84973	2.42499	-0.824237	-1.04108	-1.83637
-1.24373	-1.5006	0.283588	-1.43631	1.06219	0.587438	-0.132898	2.7105	0.694556	-0.981414	-0.936334	-0.00637875
-2.03812	-0.178309	-0.581461	-3.01047	-2.80866	-4.04716	1.36431	1.60584	0.813198	0.470879	0.14299	0.250569
1.3503	1.56312	1.92813	0.368669	2.16945	2.40248	3.16654	3.58821	3.02411	0.15059	0.169203	-0.200672
-5.43959	-3.55434	-2.98875	-5.69559	-4.92418	-3.24324	-2.51137	-1.28636	-2.00471	-1.38907	-2.73249	-2.15343
-1.18547	1.00496	-3.37564	-1.35884	0.808269	-2.87751	0.220628	-0.0185241	0.688379	0.837129	0.724402	0.842807
-3.40432	-0.941307	0.0874812	-4.2153	-3.10438	-0.740306	-6.68814	-3.44871	-1.60612	-5.15049	-3.60503	-1.15144
2.78748	2.41625	1.51294	-1.23	-1.41642	-1.44087	1.06748	2.15396	0.931523	2.00095	1.56021	0.804263
0.199548	0.223505	0.30049	-0.779086	-1.59982	-0.937136	0.239754	-0.10638	0.314347	-0.952071	-1.91711	-1.26967
0.149275	-0.933087	0.171338	0.10584	-0.22779	0.552981	0.15991	0.276141	0.520372	1.37242	0.758045	1.22239
-0.496757	-1.65863	-1.3203	-1.89635	-5.26674	-4.12835	0.474714	-0.706763	-2.07765	-0.763626	-3.91151	-3.73162
-5.89196	-4.99031	-4.58605	-4.43447	-4.69657	-4.14978	2.94389	2.05814	4.11974	1.49563	1.14629	2.88077
2.56426	1.25335	3.5607	1.26765	-1.1041	2.071	2.01346	-0.463867	2.22959	1.89653	-0.789565	1.67445
-0.026336	-0.0707996	0.223276	-0.716739	-0.360947	0.536137	1.25476	1.98602	1.13173	0.351992	0.27683	0.827895
-0.155527	-1.57081	-2.26516	-3.08644	-2.03209	-4.25502	-2.57655	-0.710525	-4.5002	0.407057	-0.130538	-2.71486
-1.25763	0.481093	-1.17753	-5.47793	-2.27624	-3.17713	-2.17703	-0.143674	-1.19815	-1.95555	-1.03279	-0.867272
0.128509	0.980174	1.50828	-0.457283	-0.340335	0.0588453	0.911186	0.356921	-0.591091	-0.907047	-0.603591	-2.25291
-2.83216	-3.67303	-2.10452	-2.77596	-4.63811	-3.82216	-2.65711	-3.326	-2.69302	-4.09114	-5.60506	-5.87939
-1.22293	0.311111	3.49864	-0.388228	0.0977805	1.85733	0.552569	1.24542	3.04768	2.56026	4.16911	5.31675
-0.67067	-1.30886	-0.728124	-2.72665	-4.23677	-2.90294	-0.994006	-2.34855	-1.1513	-1.75328	-2.93966	-2.22696
-1.56066	0.413414	-1.0933	-2.00083	-0.614316	-2.36164	-2.25485	-1.03634	-1.22484	-3.48256	-2.8466	-3.49287
-0.166784	-0.826429	-0.387397	-1.93546	-3.67333	-1.99366	-3.36464	-3.68163	-2.72535	-1.62876	-4.02601	-2.64185
0.976343	0.79153	0.388591	-1.76312	-0.807242	0.218967	0.503416	0.706013	1.41254	-0.748149	-1.34954	-0.532058
0.334372	-0.668858	0.246294	-1.71201	-1.40153	-0.694068	-1.26799	-0.814473	0.385229	-1.45723	-1.78056	-0.713867
-0.713032	-1.50263	-1.42693	-1.60636	-2.84703	-2.93658	-2.85294	-2.55107	-2.74244	-1.99307	-2.03239	-3.33321
