# Supplementary material for: Social presence effect in language comprehension: evidence from event-related potential (ERP) research
Source: PeerJ journal article supplement (doi:10.7717/peerj.18798), 2025-01-13
Supplement: ResultsForYuteng.zip [file 300-500-N400-CentralThreeZones.xlsx]

## Sheet: 300-500-N400-CentralThreeZones
PresenceOfOthersAndSemanticallyCorrectFrontal	PresenceOfOthersAndSemanticallyCorrectCentral	PresenceOfOthersAndSemanticallyCorrectParietal	PresenceOfOthersAndSemanticallyincorrectFrontal	PresenceOfOthersAndSemanticallyIncorrectCentral	PresenceOfOthersAndSemanticallyincorrectParietal	AloneAndSemanticallyCorrectFrontal	AloneAndSemanticallyCorrectCentral	AloneAndSemanticallyCorrectParietal	AloneAndSemanticallyincorrectFrontal	AloneAndSemanticallyincorrectCentral	NAloneAndSemanticallyncorrectParietal
1.16653	-1.55998	-1.02216	-0.669729	-2.77578	-3.24699	-0.659755	-1.39767	0.947122	-1.50442	-3.29111	-1.164
3.07891	3.06816	3.48793	2.64774	1.65705	3.6629	2.27839	2.42522	2.67462	1.84362	0.789164	1.4164
1.56599	0.192304	1.90296	3.29104	3.11349	3.96231	3.62764	3.46142	4.03734	1.30596	-0.466192	0.663062
0.4902	0.368058	0.870925	-1.45102	-2.6098	-3.39483	0.476119	0.919611	-1.46017	0.175744	-1.84706	-0.903568
2.95592	2.08685	2.82942	1.44221	2.12016	1.86398	2.32525	3.1381	2.56342	0.420225	-0.662964	-0.682825
-0.1834	-0.49165	0.766375	-2.23236	-3.68754	-1.65263	1.04403	0.833031	1.66472	0.865927	-0.726073	2.2623
-1.31913	-0.117822	-1.74017	-1.3285	-0.0403021	-1.35794	-0.0622961	-1.03581	-0.542937	0.0315016	-0.654456	-0.523101
2.10867	0.947605	5.60263	0.554334	-2.32616	3.4965	0.249916	0.0134295	6.30838	1.21861	-1.72532	4.64308
3.64418	3.26058	2.25427	1.54782	0.361029	1.5386	4.14417	5.28254	4.10369	4.25379	3.23924	3.70262
0.659943	0.219489	1.09762	0.100796	-0.714297	0.882653	1.84426	1.12082	1.23792	-0.482381	-1.03951	-0.541314
1.04119	-0.0708291	1.66737	-0.0502819	-0.472746	0.641141	0.779932	0.648795	1.50893	1.76336	0.806664	2.08485
1.8944	-1.24354	0.639016	1.01421	-4.31241	-1.30381	6.09335	3.23818	3.06399	1.72744	-2.70256	-1.46425
-0.906251	-2.8557	-0.0619286	-0.279036	-3.19791	-0.691758	4.70972	2.68565	4.61881	2.80499	1.36013	3.87426
1.94044	1.1254	2.2819	1.02565	-1.16103	0.476022	0.599152	-1.06723	0.662011	0.174125	-1.33007	-0.812986
2.38648	0.880334	1.74038	3.05589	1.53823	2.12802	5.25813	3.41047	4.62955	3.25483	0.12268	1.93018
3.60032	1.58966	1.38418	0.539723	-1.91684	-0.643704	2.28432	1.06193	-0.207967	3.11905	0.625569	-0.0361934
-1.03588	-0.0873712	0.0609463	-4.43605	-3.25144	-2.41993	-1.47956	0.105085	-0.338531	-2.31418	-2.45978	-3.07529
2.50329	1.72395	3.16176	3.68172	0.652009	2.54588	2.03262	0.333528	-0.0034255	1.43397	-0.642406	-1.21553
-0.08999	-1.74765	2.29098	0.290517	-2.40328	1.49108	-0.646623	-2.59998	0.759472	-1.58703	-4.08937	-2.39762
1.16873	1.88684	3.98787	3.05146	2.29384	3.06068	3.20885	3.61333	2.85623	6.54086	7.36966	6.57703
0.206319	-1.18272	1.92697	-0.8491	-3.87887	-0.313641	-0.621412	-3.03171	0.260396	-0.269871	-3.05793	-0.117822
1.31063	2.20541	2.99674	0.547205	0.950938	1.61918	-0.32278	0.290242	1.98582	-0.2566	-0.8142	0.693479
0.502012	-0.0339683	1.8604	-0.986085	-3.10187	-0.169634	-1.11869	-2.00786	1.0252	-0.957836	-3.84239	-0.32594
1.88622	1.60134	2.084	0.182275	0.0396128	1.77749	1.3066	2.06351	3.54795	-0.258825	-1.07284	0.953607
1.50871	-0.0601	1.12509	-0.209628	-1.42735	-0.597625	1.64352	0.229418	1.02511	0.442552	-1.55589	0.0631311
1.93147	-0.68873	0.679394	2.08224	-1.39564	0.227667	-0.659882	-2.51383	-1.18587	-1.01021	-2.92879	-4.4143
