# Supplementary material for: Social presence effect in language comprehension: evidence from event-related potential (ERP) research
Source: PeerJ journal article supplement (doi:10.7717/peerj.18798), 2025-01-13
Supplement: ResultsForYuteng.zip [file 300-500-N400-ParietalThreeZones.xlsx]

## Sheet: 300-500-N400-ParietalThreeZones
PresenceOfOthersAndSemanticallyCorrectFrontal	PresenceOfOthersAndSemanticallyCorrectCentral	PresenceOfOthersAndSemanticallyCorrectParietal	PresenceOfOthersAndSemanticallyincorrectFrontal	PresenceOfOthersAndSemanticallyIncorrectCentral	PresenceOfOthersAndSemanticallyincorrectParietal	AloneAndSemanticallyCorrectFrontal	AloneAndSemanticallyCorrectCentral	AloneAndSemanticallyCorrectParietal	AloneAndSemanticallyincorrectFrontal	AloneAndSemanticallyincorrectCentral	NAloneAndSemanticallyncorrectParietal
0.849184	-1.44229	-0.17392	1.16722	-2.05393	-0.285943	-0.19094	-2.41532	0.687918	1.87487	-1.42465	1.62804
3.00441	4.59863	7.01955	4.15083	4.02467	6.30347	2.20821	2.46891	4.21809	3.07313	3.68665	4.74703
3.85085	0.912537	0.355766	7.00653	1.11076	1.69679	5.18437	0.465883	4.76076	3.01821	-1.42514	-0.256305
3.20035	3.17875	2.52368	-0.801462	-2.78723	-3.12259	-2.32951	-2.07696	-3.23652	-0.519186	-2.20328	-2.33855
3.85941	1.74476	2.71295	2.87527	1.32789	1.45052	1.71901	2.63655	2.09764	2.78717	1.78407	1.56085
3.42553	1.11503	1.89312	1.74802	-2.18807	0.193305	4.59807	0.287991	4.78975	3.95783	1.02169	4.96814
-2.74039	-7.42857	-8.63089	-2.57425	-5.52071	-6.65434	-1.58354	-2.23647	-2.08534	-1.66387	-3.22959	-3.62108
5.06691	7.8891	7.49292	6.17638	8.75829	7.50204	7.36997	10.6638	10.9359	8.82434	8.48191	10.1128
3.87775	1.77841	-3.50983	5.87866	3.32046	2.77833	8.03194	7.75927	4.66023	7.37382	7.37208	2.87908
0.874217	0.446335	0.450114	1.27853	0.774837	1.70097	2.25854	0.341174	0.343553	0.260198	-1.39492	-1.25378
-1.14682	0.983527	2.37694	-2.55436	-1.57196	0.727105	-0.486945	0.159417	2.09213	-0.783273	-0.270804	1.29767
3.89602	1.46237	3.75924	1.96077	-2.01902	0.301841	8.54882	5.28506	8.83486	0.39104	-3.03765	1.68718
5.26263	3.77371	3.97345	3.49873	1.14666	2.05017	8.54102	7.31655	5.66182	8.20293	7.8218	6.69206
2.07931	1.48767	3.27207	0.949585	0.916476	1.92561	-0.226866	-0.229571	0.92233	-1.42529	-1.22483	0.1218
4.00294	2.24017	14.3199	4.69826	3.15008	1.96385	4.67774	1.71968	5.02932	2.63501	0.129715	4.90704
3.03038	1.06692	1.58979	1.25035	-1.15772	0.172727	1.63614	-0.29795	-0.0239767	2.45036	-0.0451548	0.188296
1.23485	0.941713	-2.3667	-0.963411	-1.397	-1.18186	0.869349	0.657208	-1.12199	0.786748	-1.62144	-5.71267
2.35043	-0.517184	0.566007	6.17524	1.06864	2.22494	3.21549	-0.528263	0.854077	3.45375	-2.55125	0.151453
5.90772	3.76711	6.28741	6.64528	3.13457	6.69662	5.05176	3.77011	5.14413	3.37283	0.0870683	3.11802
0.488217	0.336448	2.08804	1.59211	0.742722	0.563047	1.24986	1.68447	1.07404	4.42179	5.55423	4.38741
3.24086	0.431799	4.72131	3.62436	-0.15263	3.80075	2.5187	-1.01655	3.23524	4.10971	-0.40815	4.14616
1.34844	2.81804	5.91	0.732957	1.23203	4.15562	0.0899502	2.03697	5.87647	1.86379	2.35509	5.32463
0.878545	0.912475	3.66856	1.4081	-1.08766	1.90615	1.40173	1.478	4.52708	1.7333	0.206085	2.80594
3.54814	2.93645	3.66218	1.78871	2.13613	3.91253	4.22694	3.79863	4.93429	2.98986	2.73021	3.14284
2.33164	1.40292	1.14792	0.487682	-0.646742	-0.559315	2.29196	0.046114	0.367716	1.19392	-0.710598	-0.0131565
2.64805	4.13072	6.89775	2.82272	4.20658	5.77466	3.22998	4.70854	6.64782	0.325492	2.45911	2.72304
