# Supplementary material for: Social presence effect in language comprehension: evidence from event-related potential (ERP) research
Source: PeerJ journal article supplement (doi:10.7717/peerj.18798), 2025-01-13
Supplement: ResultsForYuteng.zip [file 550-800-P600-CentralThreeZones.xlsx]

## Sheet: 550-800-P600-CentralThreeZones
PresenceOfOthersAndSemanticallyCorrectFrontal	PresenceOfOthersAndSemanticallyCorrectCentral	PresenceOfOthersAndSemanticallyCorrectParietal	PresenceOfOthersAndSemanticallyincorrectFrontal	PresenceOfOthersAndSemanticallyIncorrectCentral	PresenceOfOthersAndSemanticallyincorrectParietal	AloneAndSemanticallyCorrectFrontal	AloneAndSemanticallyCorrectCentral	AloneAndSemanticallyCorrectParietal	AloneAndSemanticallyincorrectFrontal	AloneAndSemanticallyincorrectCentral	NAloneAndSemanticallyncorrectParietal
1.35541	0.145339	0.123898	0.52148	0.900103	-0.425679	-0.188979	0.0977022	2.02404	-0.29995	0.645438	2.09904
3.97004	3.45188	3.69837	4.48196	3.93089	4.92513	2.13444	3.49381	4.10325	3.29427	3.08546	3.07309
3.11753	1.89713	2.93998	9.02945	10.2205	9.04451	3.43997	4.5066	5.12985	6.55725	6.7174	5.99941
-1.33346	0.0136004	2.11646	-2.00742	-2.31826	-0.913108	-0.822127	1.18705	-2.36832	-5.12958	-4.89529	-2.69376
2.97214	2.74603	2.74189	2.25391	2.50126	2.02165	4.38408	4.42161	3.76894	2.78888	1.68332	0.967001
0.503133	2.0423	2.86909	-1.00495	-1.85374	-1.24943	0.9828	1.69727	0.980072	2.36979	1.27772	4.83239
-0.357134	-1.23412	-2.15628	-1.10284	-0.231671	-0.695854	1.55238	0.0368724	0.160692	1.12908	-0.167296	1.25099
2.06608	4.18096	2.08124	2.59902	2.95035	0.878561	-0.392078	2.88538	4.04051	1.69214	2.37883	0.81194
2.37737	1.87629	1.63285	4.75714	3.47642	3.4907	3.29748	3.83896	2.94847	6.74728	6.17437	5.25377
1.82596	1.00668	1.11231	2.74319	1.20021	1.63114	2.81142	2.02825	0.89866	0.39934	0.637671	-0.530956
1.21447	0.834584	1.46941	0.851917	1.17569	0.702382	0.900147	2.55901	1.76946	1.4876	1.7889	0.617387
-1.3182	0.0239419	0.811923	4.87048	2.98251	3.41509	5.90963	4.59689	2.83856	5.91353	4.56664	4.34307
2.38491	0.796677	1.91418	1.8234	-0.325932	0.874117	7.95226	6.98652	7.15997	5.36277	3.37061	4.93384
1.59883	1.89409	3.94553	1.74215	-0.743234	2.54325	0.881033	-0.71292	0.868703	0.557753	-0.556108	-0.153622
-0.235156	0.336067	0.639473	3.09272	3.19816	3.03775	0.620898	0.542672	1.38582	1.32691	0.458693	1.52783
4.03857	2.03183	1.45563	2.6251	0.953996	1.13839	2.17175	0.667562	0.110255	6.63638	4.72103	2.50528
0.903191	2.45163	0.379217	-0.833841	1.26277	-0.786438	0.244061	3.10192	0.397856	0.837226	1.66843	-0.710364
2.12117	2.79081	3.15505	4.61266	2.26585	4.68232	3.75705	3.05683	-0.187052	3.92177	1.0696	-0.539064
0.735764	0.700566	1.39757	1.37363	-0.478286	0.701876	0.280732	-1.02196	0.0614248	0.00552801	-1.00351	-1.3594
2.75928	4.0563	5.35284	4.38719	5.30181	4.49135	5.33955	9.05667	6.91807	8.98146	12.5381	10.3427
2.25804	1.39636	3.10709	1.97818	-0.291475	0.278403	-0.207753	-1.10475	1.19239	2.53354	0.0743215	0.639117
1.71962	2.92645	2.85186	1.16479	2.80046	2.09065	-0.551103	1.00831	2.13991	0.00439779	1.70269	1.7233
1.5239	2.14376	3.27559	1.16348	-0.912567	0.610233	-0.370157	-0.820309	1.63456	1.34781	-1.76815	0.414352
-1.18801	-0.649689	-0.220067	-1.22327	-0.934225	1.09458	-1.27099	0.762293	2.64064	-0.831221	0.616882	2.52266
0.71636	1.24335	2.32775	-0.351358	0.447113	1.4347	1.49333	1.8877	2.14565	0.332563	0.00704317	1.67732
3.7352	2.40204	2.52413	4.64806	3.72476	4.59399	-3.31121	-1.43744	-0.598435	-1.7984	-0.847327	-2.05254
