# Supplementary material for: Social presence effect in language comprehension: evidence from event-related potential (ERP) research
Source: PeerJ journal article supplement (doi:10.7717/peerj.18798), 2025-01-13
Supplement: ResultsForYuteng.zip [file 550-800-P600-ParietalThreeZones.xlsx]

## Sheet: 550-800-P600-ParietalThreeZones
PresenceOfOthersAndSemanticallyCorrectFrontal	PresenceOfOthersAndSemanticallyCorrectCentral	PresenceOfOthersAndSemanticallyCorrectParietal	PresenceOfOthersAndSemanticallyincorrectFrontal	PresenceOfOthersAndSemanticallyIncorrectCentral	PresenceOfOthersAndSemanticallyincorrectParietal	AloneAndSemanticallyCorrectFrontal	AloneAndSemanticallyCorrectCentral	AloneAndSemanticallyCorrectParietal	AloneAndSemanticallyincorrectFrontal	AloneAndSemanticallyincorrectCentral	NAloneAndSemanticallyncorrectParietal
0.455428	0.543014	-2.60915	0.16369	0.727635	-2.27645	-1.28332	-1.1816	-0.150277	0.0509415	0.0769502	-1.7717
2.94457	2.37939	3.30277	4.47034	3.24295	4.23702	3.31449	2.30762	2.23261	4.89936	4.22534	3.24079
3.24045	3.02368	1.90199	10.2071	5.59846	4.94196	4.13751	2.28889	5.66221	5.797	3.60085	3.5111
-1.50693	-0.588508	-2.57891	-0.720895	1.01364	-0.871406	-6.09633	-4.18705	-7.49696	-5.36538	-4.21167	-5.50348
5.02524	2.48525	3.8631	5.25614	4.31653	3.54831	5.21152	7.1754	4.31167	4.75438	4.69039	4.06169
-1.46474	-2.46498	-4.68204	-0.160616	-4.70114	-2.97602	-0.644261	-3.85568	-3.9933	1.15574	-0.273522	-2.49897
-2.10634	-6.76479	-7.91265	-1.20222	-1.99299	-4.15457	0.817859	0.764267	0.0316108	0.213769	1.62746	0.536148
-1.36482	1.7793	-1.72039	2.01669	3.98679	-1.74014	0.628461	3.45122	1.11548	1.7398	0.378865	-2.08104
1.74386	1.94098	-2.28705	7.24917	6.27224	7.0127	3.28402	3.94397	4.77009	7.50289	9.0783	0.400588
0.310205	-0.378656	-1.12593	1.89759	1.38535	0.904774	2.62227	-0.140383	-0.926693	0.200219	-1.62262	-2.40412
-2.70735	-0.0137249	1.46484	-3.39089	-0.337572	1.25515	-0.490194	1.90518	3.65465	-1.41103	-0.549517	1.00945
2.57157	2.91218	3.68629	8.81671	7.60975	6.43058	8.24539	7.44605	8.93701	8.97086	7.66653	8.54709
7.63949	5.50255	3.19263	6.28275	3.97651	2.68907	11.728	11.8551	7.18092	10.2749	10.6928	7.62063
1.51876	1.91748	3.25842	2.3255	2.87475	3.9101	1.04859	0.363343	1.19955	-1.62512	-1.5145	-0.30103
-0.468212	-0.364542	5.42197	1.09797	2.58804	4.43315	-2.54137	-3.04866	-4.02776	-2.22703	-2.17649	-1.07622
2.44624	2.24325	0.53252	2.13176	1.20517	-0.529402	-0.115074	-0.737837	-2.43865	4.79337	3.88465	0.894836
0.657485	2.66425	-3.43906	-1.11684	-0.218011	-2.49317	-1.49144	-0.250583	-4.13809	1.20389	0.745095	-6.49258
-0.095508	0.85257	1.46979	4.96804	2.81815	4.64852	5.77757	5.54317	3.88149	6.10522	1.59169	3.07478
1.45832	-1.86342	0.380542	4.87534	0.0449367	3.02669	2.808	0.392488	0.346812	2.44082	-1.29243	0.433
-1.22123	1.82753	1.58832	-0.665383	2.45613	-0.17458	-0.474763	5.23702	1.53008	3.03149	8.77872	3.56065
2.53045	1.76543	2.97439	2.85091	0.844761	1.45479	1.23306	0.888851	2.24126	4.70506	2.7012	3.77498
1.74036	3.24254	4.18991	2.30217	2.70828	3.45526	0.817933	2.96605	5.07887	4.14984	5.20182	6.39162
0.0785511	2.38983	3.67709	1.47536	0.693204	2.11012	0.585622	2.7616	3.75557	2.38912	3.13233	3.77421
-0.677834	0.25317	0.248756	-0.433864	0.394185	0.693513	1.10609	1.90263	2.39083	2.54752	4.08617	2.81975
1.14733	2.73442	2.07331	0.601492	2.02146	1.71912	1.00305	1.36702	1.52047	1.27871	1.18825	1.70469
2.17714	5.8587	5.8449	2.84488	6.82402	7.87686	-1.11465	2.29101	2.358	-1.19975	3.24067	2.0717
