# Supplementary material for: Social presence effect in language comprehension: evidence from event-related potential (ERP) research
Source: PeerJ journal article supplement (doi:10.7717/peerj.18798), 2025-01-13
Supplement: ResultsForYuteng.zip [file BehaviorData.xlsx]

## Sheet: BehaviorData
subject	PresenceOfOthersAndSemanticallyCorrectACC	PresenceOfOthersAndSemanticallyIncorrectACC	AloneAndSemanticallyCorrectACC	AloneAndSemanticallyIncorrectACC	PresenceOfOthersAndSemanticallyCorrectRT	PresenceOfOthersAndSemanticallyIncorrectRT	AloneAndSemanticallyCorrectRT	AloneAndSemanticallyIncorrectRT
2	44	42	47	49	490.878	398.225	453.348	435.957
3	47	40	45	46	604.348	566.973	481.976	597.818
4	49	43	50	50	444.542	398.775	491.551	465.562
5	49	42	50	43	587.894	557.634	607.714	546.293
7	48	42	49	48	315.717	367.1	439.085	481.667
9	46	40	43	37	759.841	796.553	565.488	609.5
12	50	49	48	41	444.532	463.674	617.705	599.513
14	49	46	49	43	432.702	504.628	455.644	510.15
15	50	49	49	43	432.298	441.574	425.957	405.31
16	49	47	43	39	537.489	486.548	711.415	577
17	44	42	41	36	545.098	525.025	549.974	476.424
18	45	48	40	35	830.452	699.043	864.162	804.545
20	49	40	49	49	489.891	527.816	430.065	502.979
21	50	47	49	41	522.688	518.933	592.729	537.179
22	48	47	48	43	330.756	338.227	312.956	322.69
23	47	42	48	49	623.227	601.125	444.239	513.213
24	50	39	47	49	565.521	617.895	588.023	509.609
27	48	43	46	48	496.935	511.976	593.256	524.457
28	38	48	38	41	568.472	573.87	638.889	562.667
30	49	48	50	43	554.957	545.739	438.702	470.833
34	41	37	43	32	715.385	713.743	624.756	558.931
35	50	49	49	42	427.714	411.936	430.574	403
36	48	47	48	42	713.333	670.523	699.565	619.6
37	46	44	49	47	332.14	307.341	312.646	316.136
38	47	39	46	48	309.318	376.108	274.738	293.37
39	47	42	48	35	449.955	501.872	441.089	355.562
